# Supplementary material
Source: Springer Nature journal article supplement (https://www.springermedizin.de/resource/supplementary/12889_2014_6793_MOESM4_ESM.pdf/9499046)

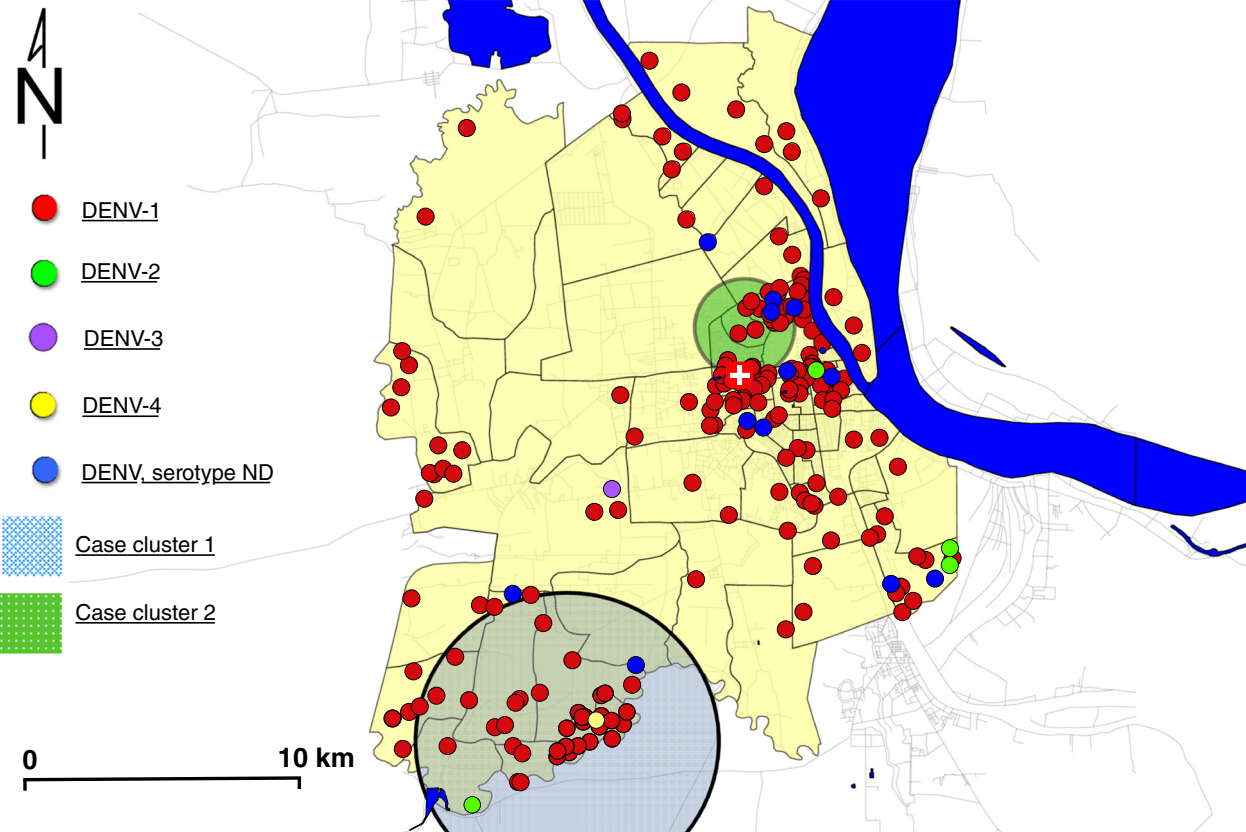

Supplement: MOESM4 [file 9499046]
